# Supplementary material for: Intertemporal Improvement in Physicians’ Perceptions of the Short-Term Adverse Outcomes of Neonatal Pain: Results of a Two-Time-Point National Survey
Source: MDPI journal article supplement (doi:10.3390/children11040471), 2024-04-15
Supplement: s1 [file s1]

# SUPPLEMENTARY MATERIAL

Table S1. The questionnaire used in the current study

1<sup>ST</sup> DEPARTMENT OF NEONATOLOGY AND INTENSIVE NEONATAL CARE

## QUESTIONNAIRE CONCERNING PHYSICIANS' PRECEPTIONS ON POTENTIAL SHORT-TERM ADVERSE EFFECTS OF ANALGESIA AND SEDATION IN NEONATAL INTENSIVE CARE UNITS.

### PERSONAL DATA (not identifying responder's ID)

Sex: male ...☐..... female ...☐.....

Type of NICU where you work: A. Public Hosp ..☐ B. Private Hosp..☐

Work experience: A. qualified neonatologist ..☐ B. pediatrician working in NICU for at least 3 years ..☐ C. Fellows ..☐.

Years working in the NICU: .....

Questionnaire regarding your views on potential short term adverse effect of pain on the neonate

1A. Do you believe that neonates can feel pain?

YES ☐ NO ☐ □

1.B. Do you believe that pain may have adverse effects on the neonate?

YES ☐ NO ☐ □

1.C. If your reply is yes to the 1.B. question, which of following organ/system – specific adverse effect might be?? Check (YES) for positive answers.

|          | Domains and items               | YES | NO |
|----------|---------------------------------|-----|----|
| <b>1</b> | <b>CNS</b>                      |     |    |
| 1.1.     | change of cerebral blood flow   |     |    |
| 1.2      | Cerebral hemorrhage             |     |    |
| 1.3      | Increased intracranial pressure |     |    |

|          |                                                         |  |  |
|----------|---------------------------------------------------------|--|--|
| 1.4      | Increased stress responses                              |  |  |
| <b>2</b> | <b>Cardiovascular system</b>                            |  |  |
| 2.1      | Hypertension                                            |  |  |
| 2.2      | Tachycardia                                             |  |  |
| 2.3      | Bradycardia                                             |  |  |
| 2.4      | Heart rate fluctuation                                  |  |  |
| 2.5      | Pulmonary hypertension                                  |  |  |
| 2.6      | Circulatory collapse                                    |  |  |
| <b>3</b> | <b>Respiratory system</b>                               |  |  |
| 3.1      | Irregular breathing pattern                             |  |  |
| 3.2      | Apneic spells                                           |  |  |
| 3.3      | Respiratory distress                                    |  |  |
| 3.4      | Oxygen desaturations                                    |  |  |
| 3.5      | Hypoxemia                                               |  |  |
| 3.6      | Ventilator asynchrony                                   |  |  |
| 3.7      | Increase duration of mechanical ventilation             |  |  |
| 3.8      | Pneumothorax                                            |  |  |
| <b>4</b> | <b>Other systems (growth, metabolism, endocrine s.)</b> |  |  |
| 4.1      | Deterioration of the clinical condition                 |  |  |
| 4.2      | Hormonal & metabolic derangement                        |  |  |
| 4.3      | Slow growth rate                                        |  |  |
